# Supplementary material for: Interannual variability of the initiation of the phytoplankton growing period in two French coastal ecosystems
Source: Copernicus journal article supplement (doi:10.5194/bg-2022-86), 2022-04-14
Supplement: Supplementary file 1 [file bg-2022-86-supplement.pdf]

## Supplement

(a)

| <i>Years</i> | <i>SST</i><br>(°C) | <i>PAR</i><br>( $W m^{-2}$ ) | <i>Wind intensity</i><br>( $m s^{-1}$ ) | <i>Turbidity</i><br>(NTU) | <i>River Flow</i><br>( $m^3 s^{-1}$ ) |
|--------------|--------------------|------------------------------|-----------------------------------------|---------------------------|---------------------------------------|
| 2001         | 11.7               | 1187                         | 4.7                                     | 0.3                       | 71.9                                  |
| 2002         | 10.3               | 708                          | 5.1                                     | 4.3                       | 35.8                                  |
| 2003         | 10.9               | 1573                         | 3.4                                     | 4.7                       | 14.5                                  |
| 2004         | 9.3                | 1097                         | 4.8                                     | 2.3                       | 31.4                                  |
| 2007         | 10.8               | 937                          | 4.7                                     | 34.4                      | 90.9                                  |
| 2010         | 8.2                | 682                          | 4.8                                     | 5.5                       | 102.3                                 |
| 2011         | 9.4                | 985                          | 4.6                                     | 3.6                       | 38.4                                  |
| 2012         | 11.4               | 1310                         | 3.7                                     | 4.6                       | 13.7                                  |
| 2013         | 9.0                | 689                          | 4.5                                     | 6.0                       | 60.7                                  |
| 2014         | 10.0               | 934                          | 5.2                                     | 15.4                      | 95.1                                  |
| 2015         | 10.0               | 816                          | 5.1                                     | 8                         | 68.9                                  |
| 2016         | 10.1               | 816                          | 5.1                                     | 9.4                       | 93.3                                  |
| 2017         | 11.8               | 1615                         | 4.4                                     | 10.3                      | 16.8                                  |
| 2019         | 13.8               | 1605                         | 3.9                                     | 8.2                       | 25.9                                  |

(b)

| <i>Years</i> | <i>SST</i>  | <i>PAR</i>                | <i>Wind intensity</i>     | <i>Turbidity</i> | <i>Riv. F. V.</i>                     | <i>Riv. F. L</i>                      |
|--------------|-------------|---------------------------|---------------------------|------------------|---------------------------------------|---------------------------------------|
|              | <i>(°C)</i> | <i>(W m<sup>-2</sup>)</i> | <i>(m s<sup>-1</sup>)</i> | <i>(NTU)</i>     | <i>(m<sup>3</sup> s<sup>-1</sup>)</i> | <i>(m<sup>3</sup> s<sup>-1</sup>)</i> |
| <i>2011</i>  | <i>9.2</i>  | <i>1009</i>               | <i>3.4</i>                | <i>8.3</i>       | <i>97.7</i>                           | <i>676.7</i>                          |
| <i>2012</i>  | <i>9.6</i>  | <i>830</i>                | <i>2.2</i>                | <i>19.2</i>      | <i>40.8</i>                           | <i>613.0</i>                          |
| <i>2013</i>  | <i>8.6</i>  | <i>884</i>                | <i>3.7</i>                | <i>13.2</i>      | <i>188.0</i>                          | <i>1519.8</i>                         |
| <i>2014</i>  | <i>10.8</i> | <i>1212</i>               | <i>3.0</i>                | <i>7.6</i>       | <i>207.6</i>                          | <i>1509.5</i>                         |
| <i>2015</i>  | <i>10.3</i> | <i>905</i>                | <i>3.3</i>                | <i>9.8</i>       | <i>158.8</i>                          | <i>1421.1</i>                         |
| <i>2016</i>  | <i>9.6</i>  | <i>1082</i>               | <i>3.9</i>                | <i>11.1</i>      | <i>169.6</i>                          | <i>1656.1</i>                         |
| <i>2017</i>  | <i>11.4</i> | <i>1482</i>               | <i>3.3</i>                | <i>6.9</i>       | <i>38.7</i>                           | <i>955.7</i>                          |
| <i>2018</i>  | <i>8.9</i>  | <i>929</i>                | <i>3.9</i>                | <i>16.4</i>      | <i>177.6</i>                          | <i>1589.0</i>                         |
| <i>2019</i>  | <i>11.4</i> | <i>1522</i>               | <i>2.8</i>                | <i>8.7</i>       | <i>48.3</i>                           | <i>525.5</i>                          |

**Table S1: Medians of the main environmental parameters over the 15 days preceding the IPGP and the 15 days after the IPGP in the (a) Bay of Brest and (b) Bay of Vilaine.**

(a)

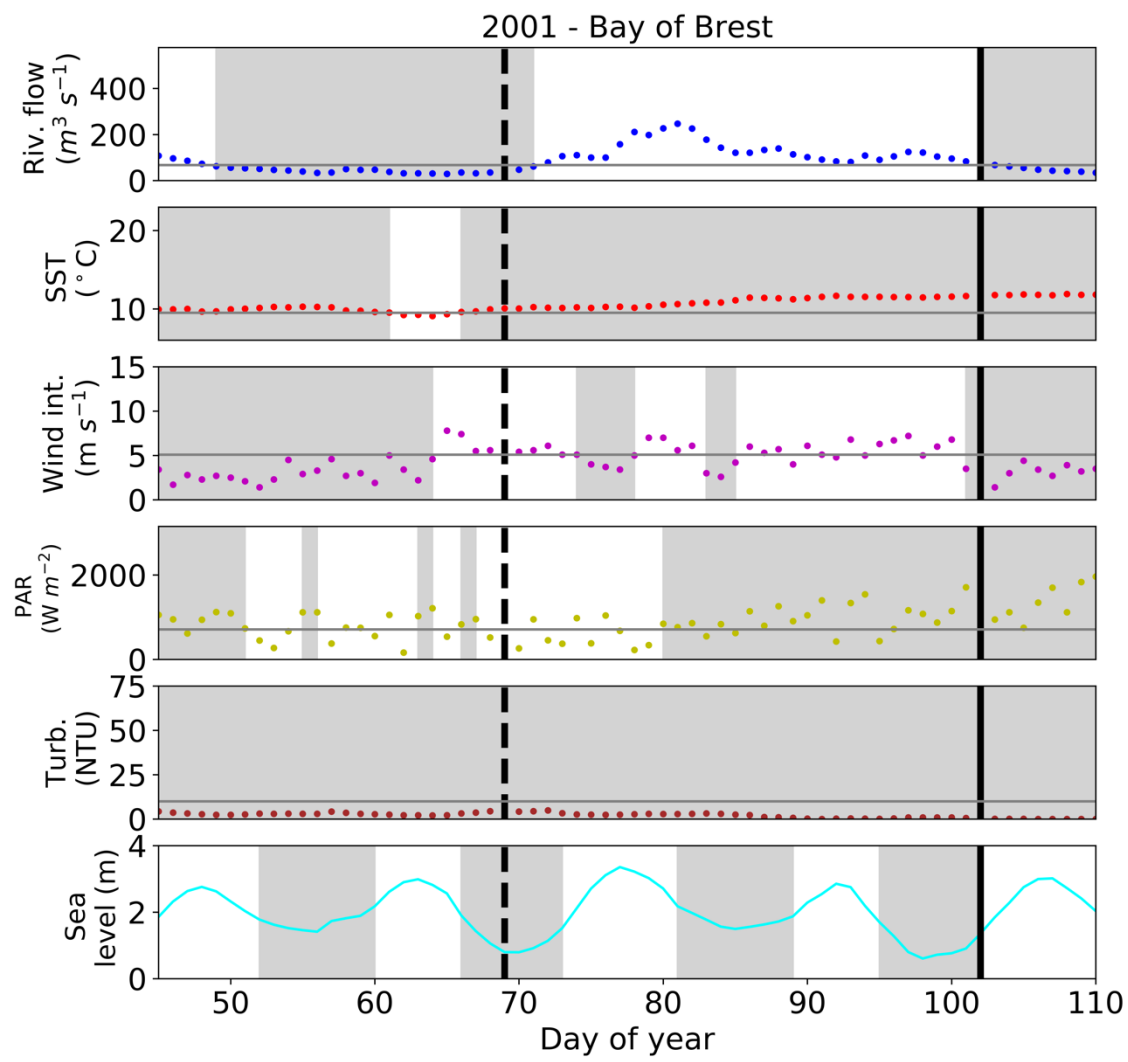

(b)

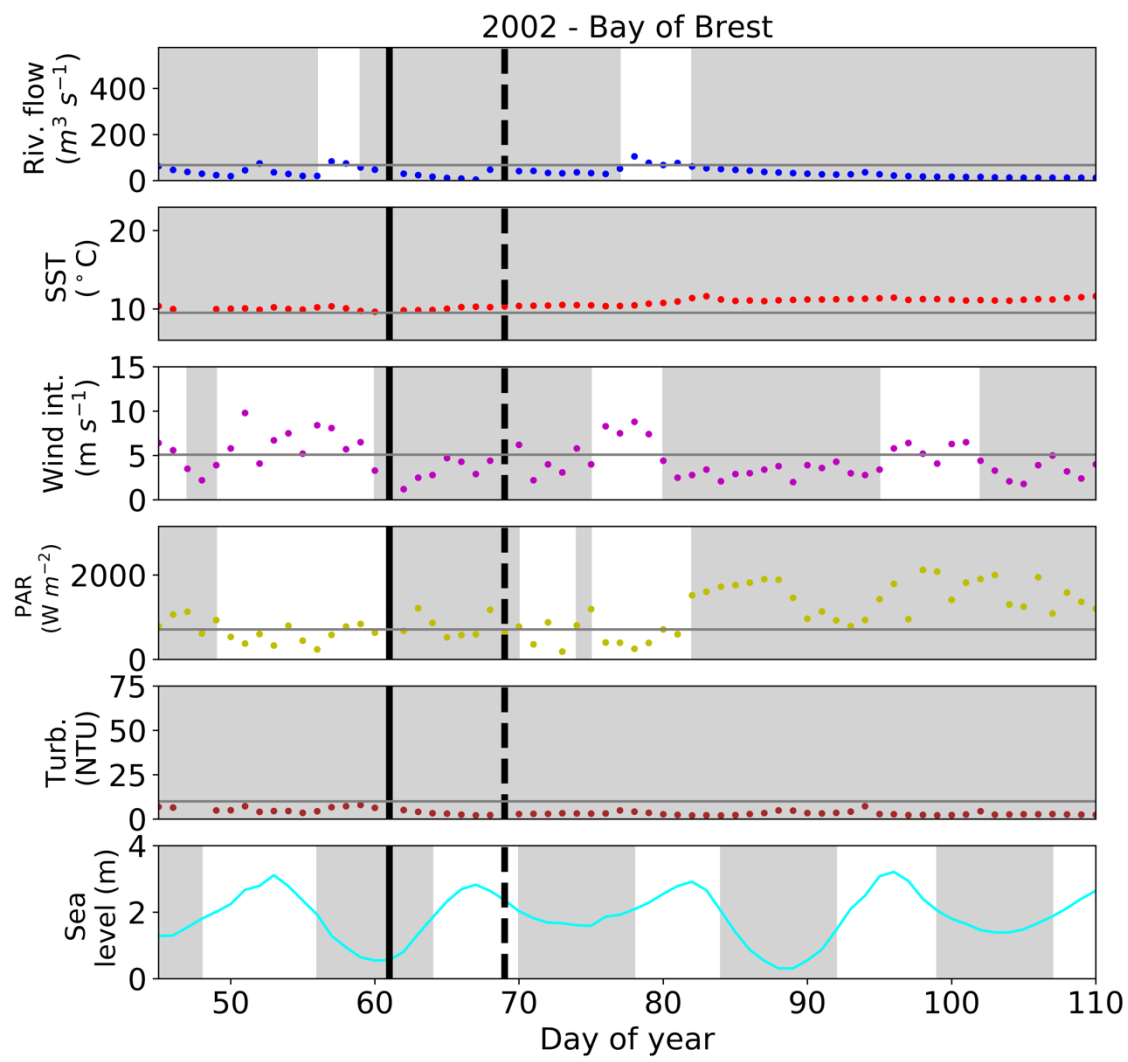

(c)

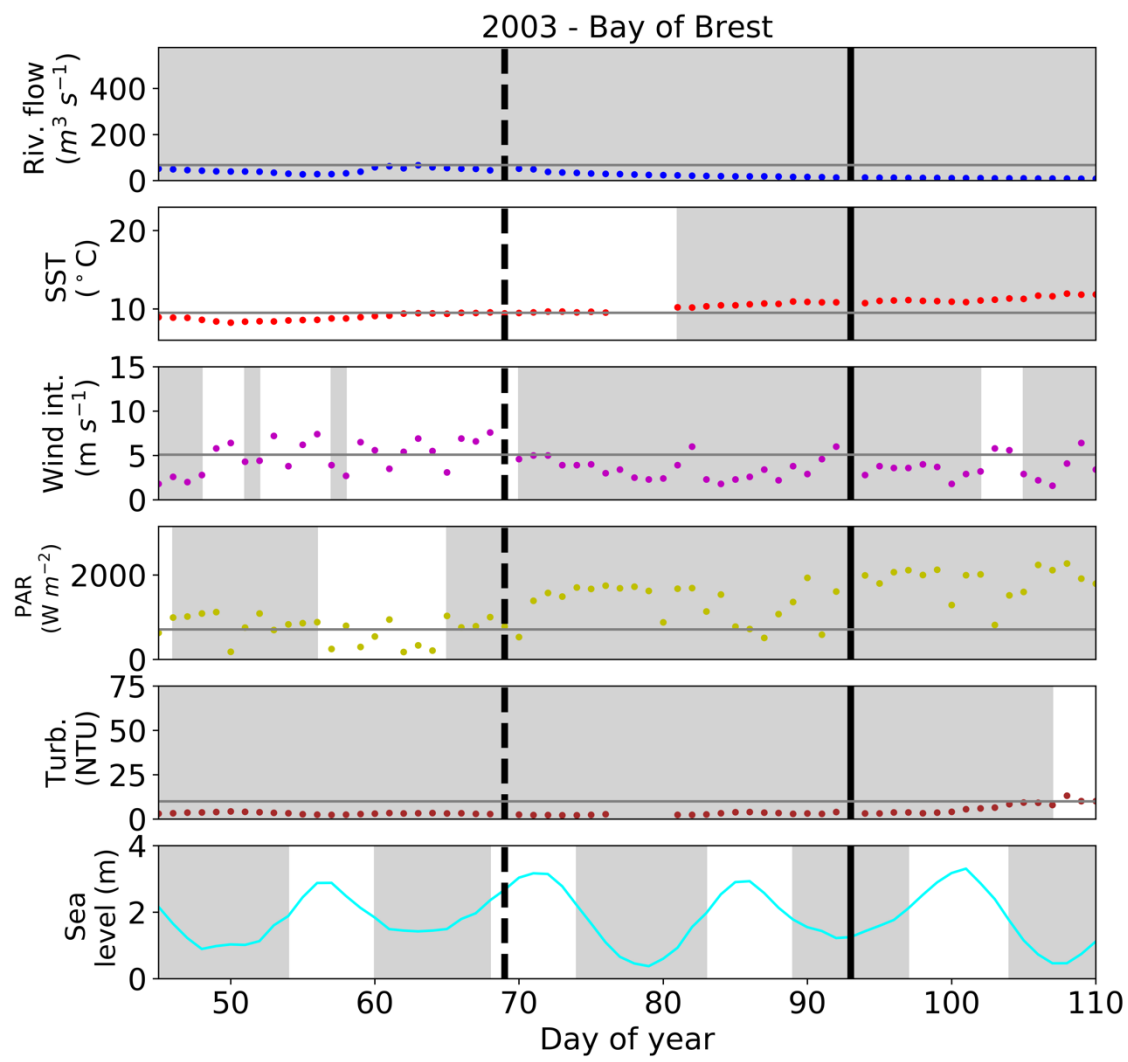

(d)

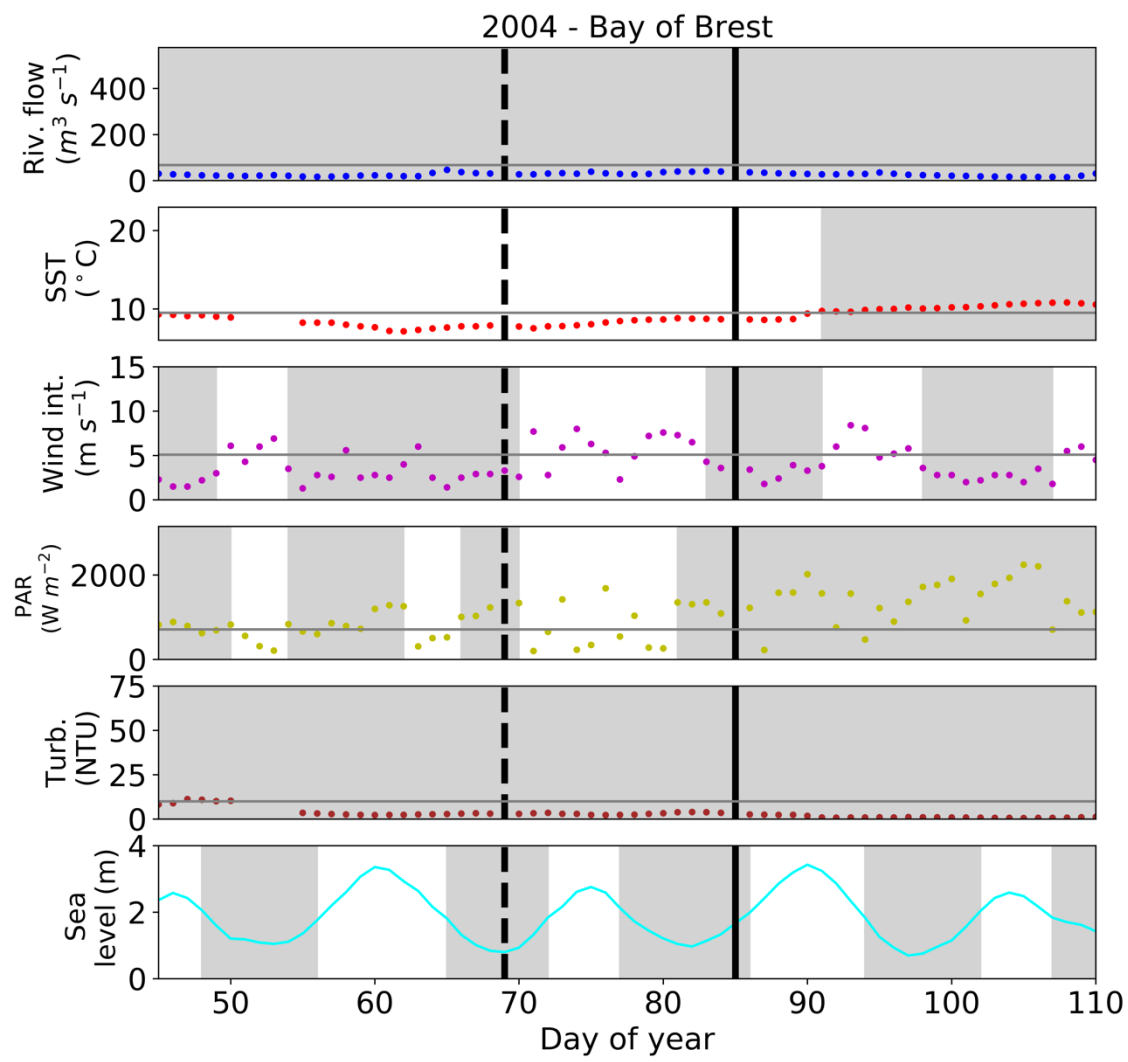

(e)

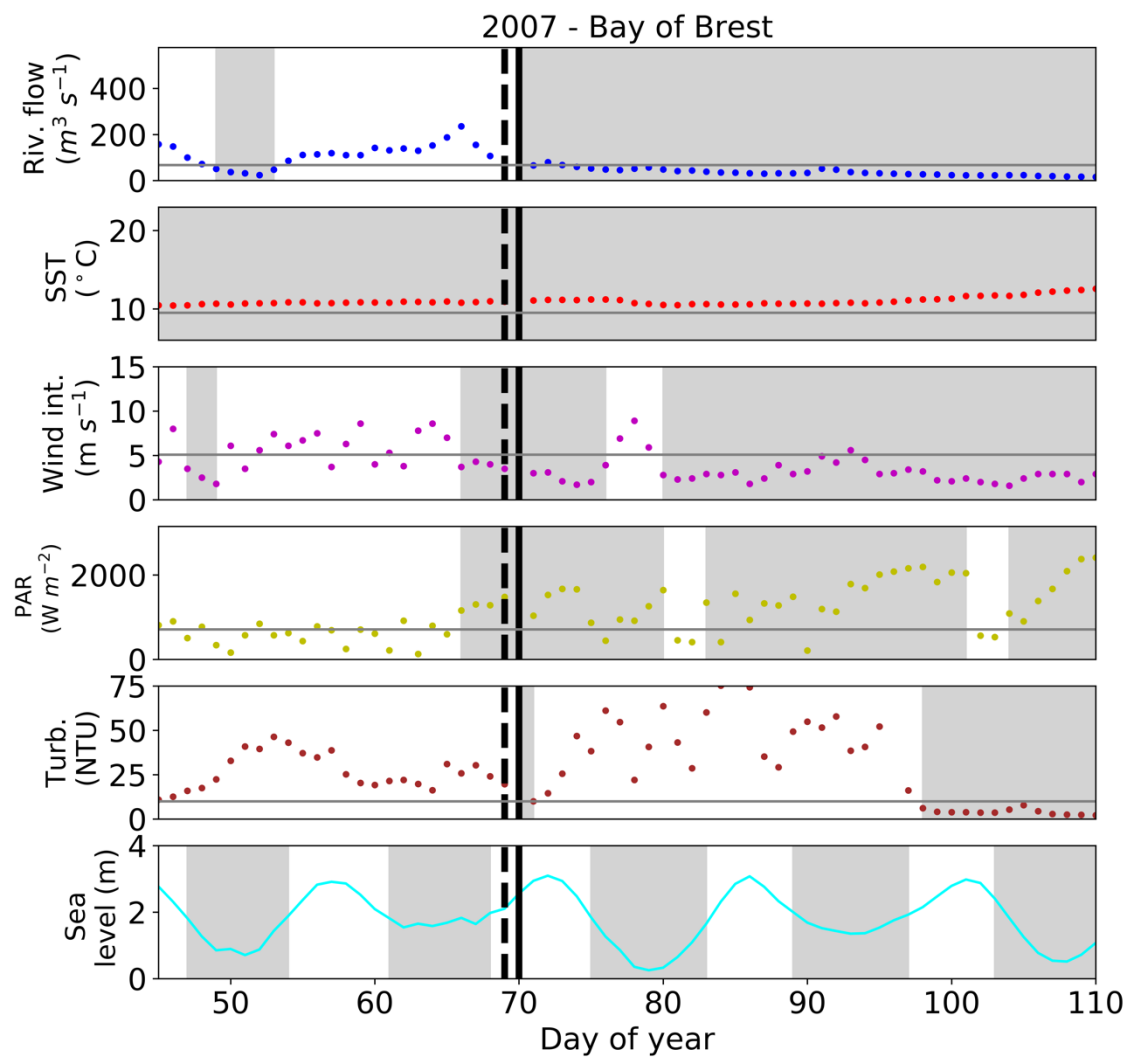

(f)

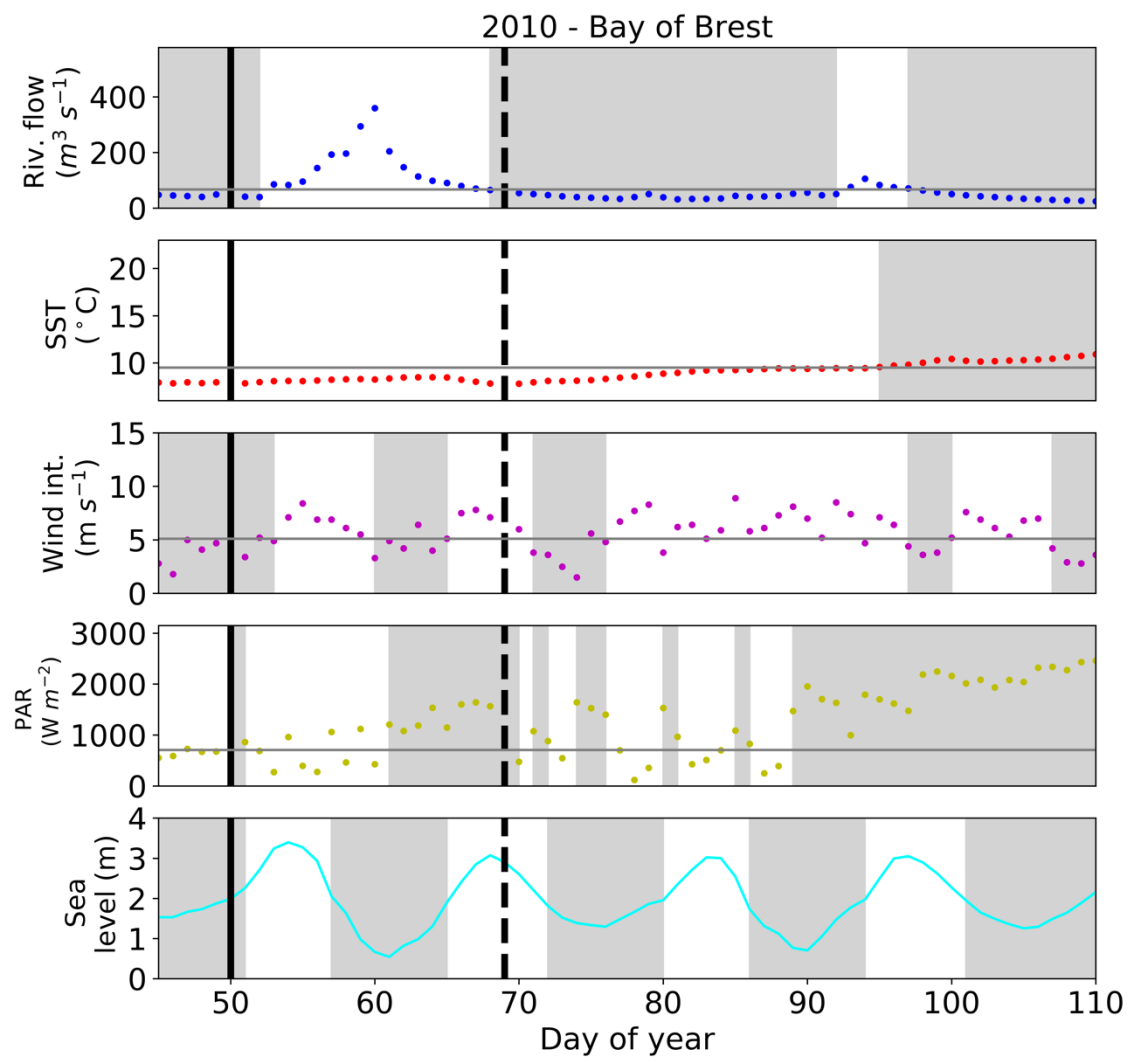

(g)



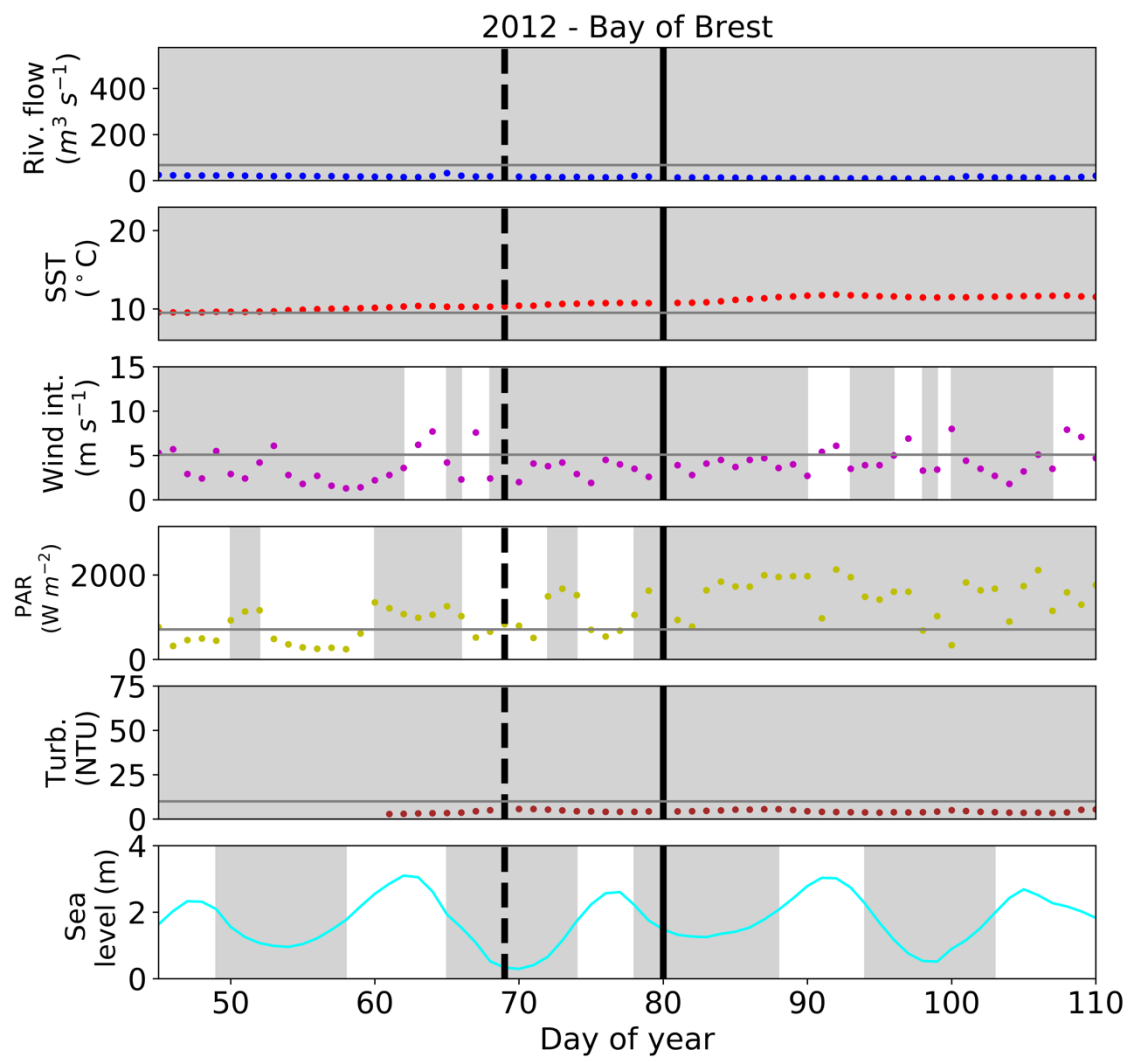

(h)

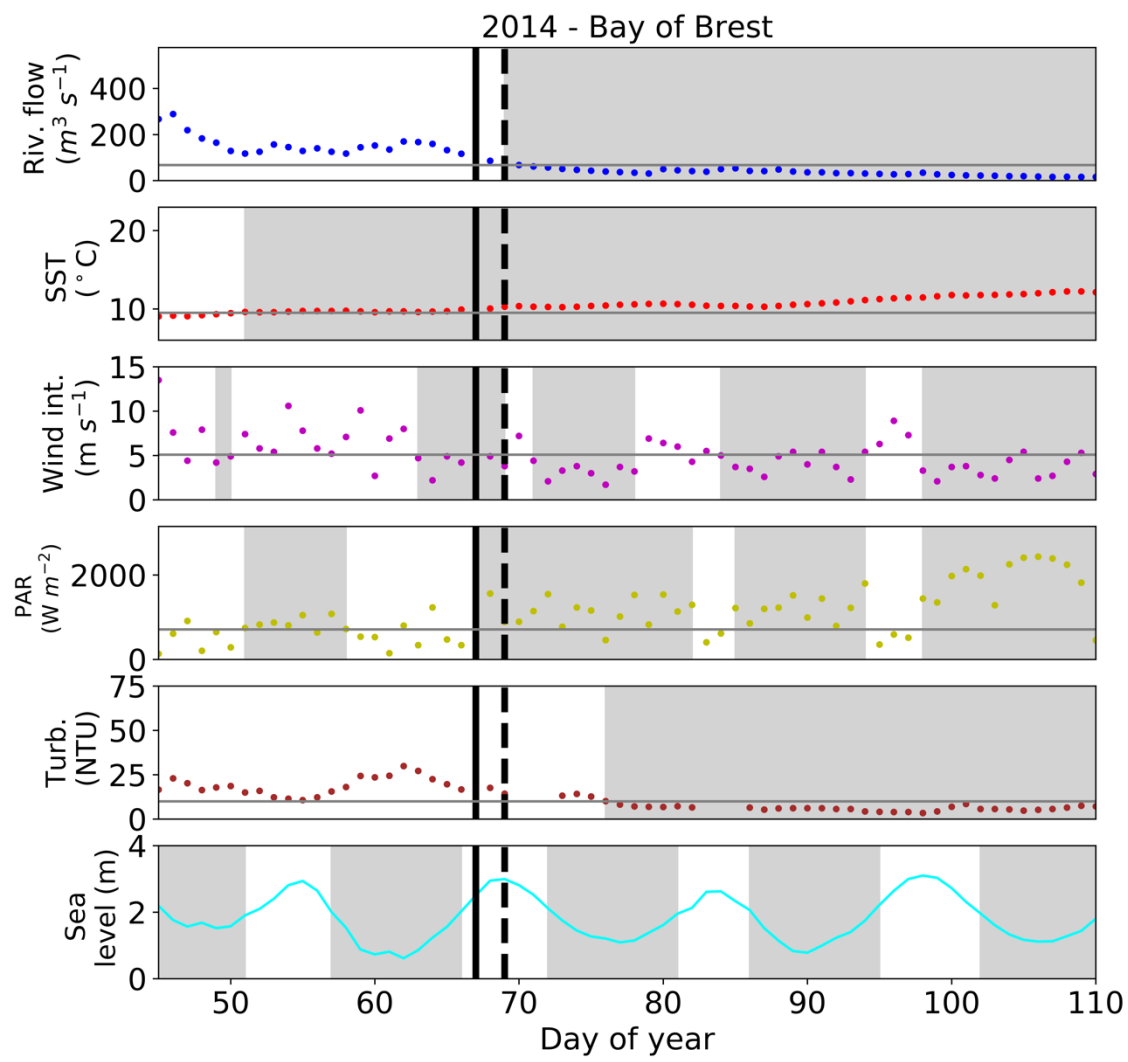

(i)

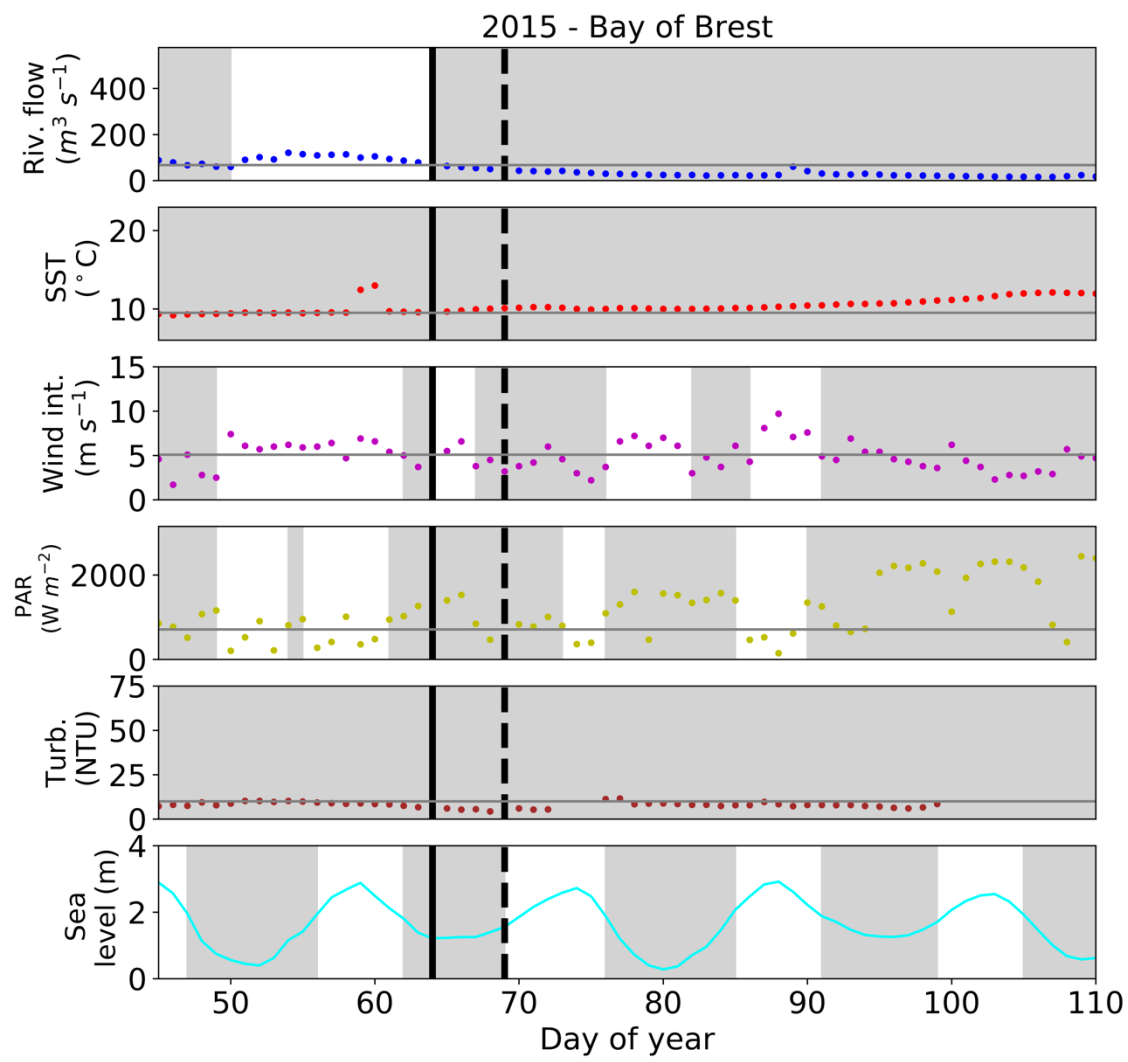

(j)

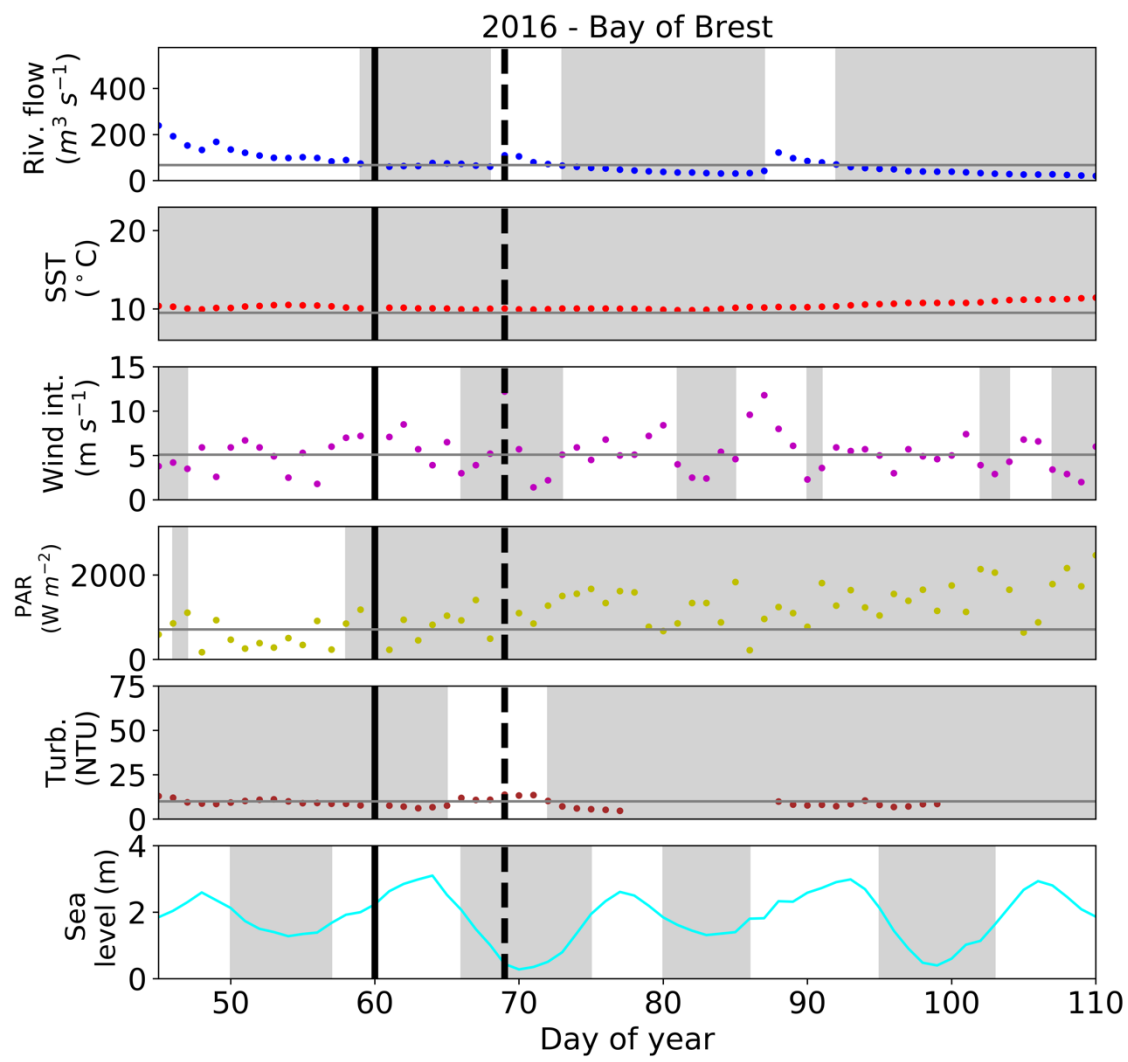

(k)

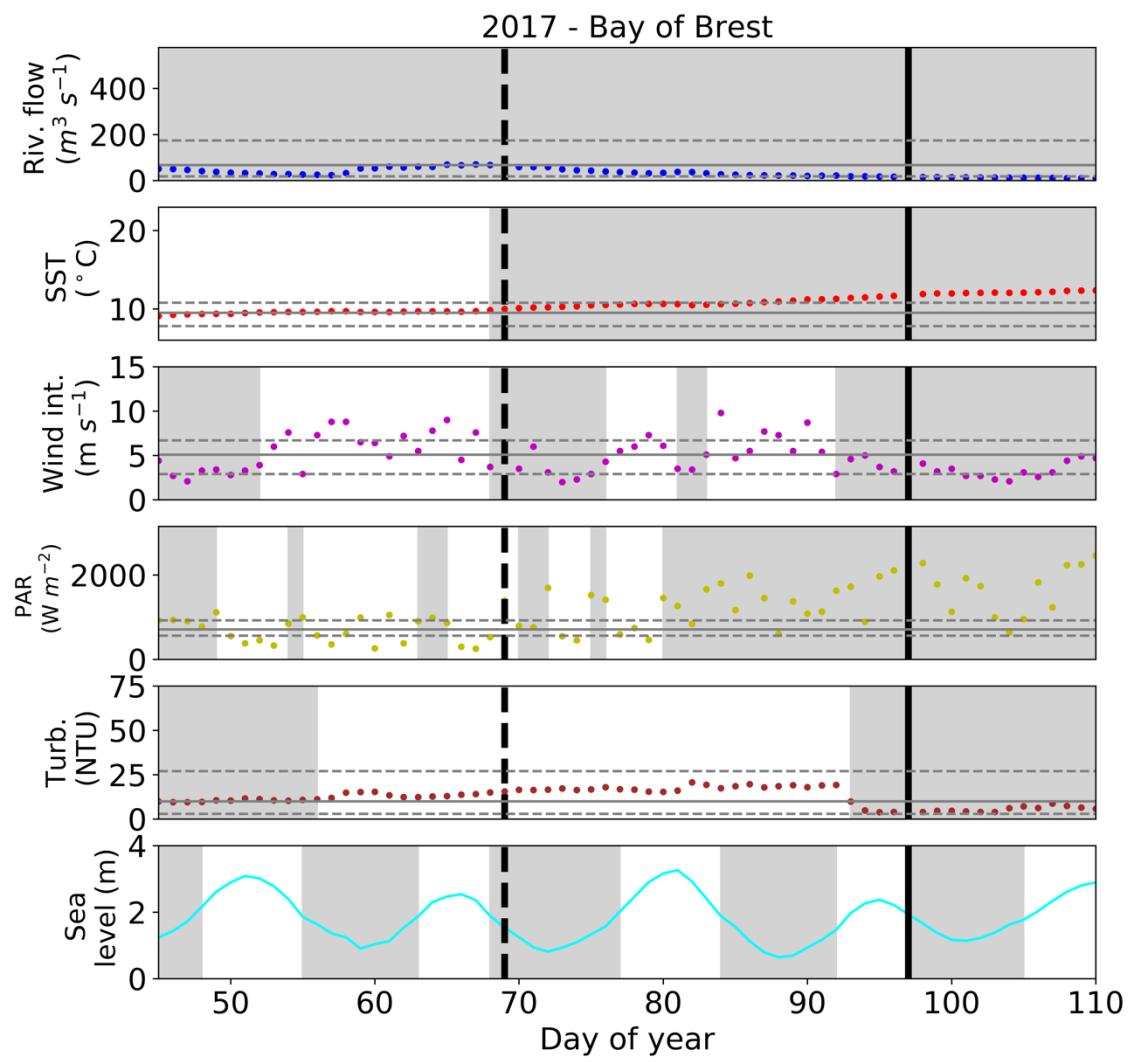

①

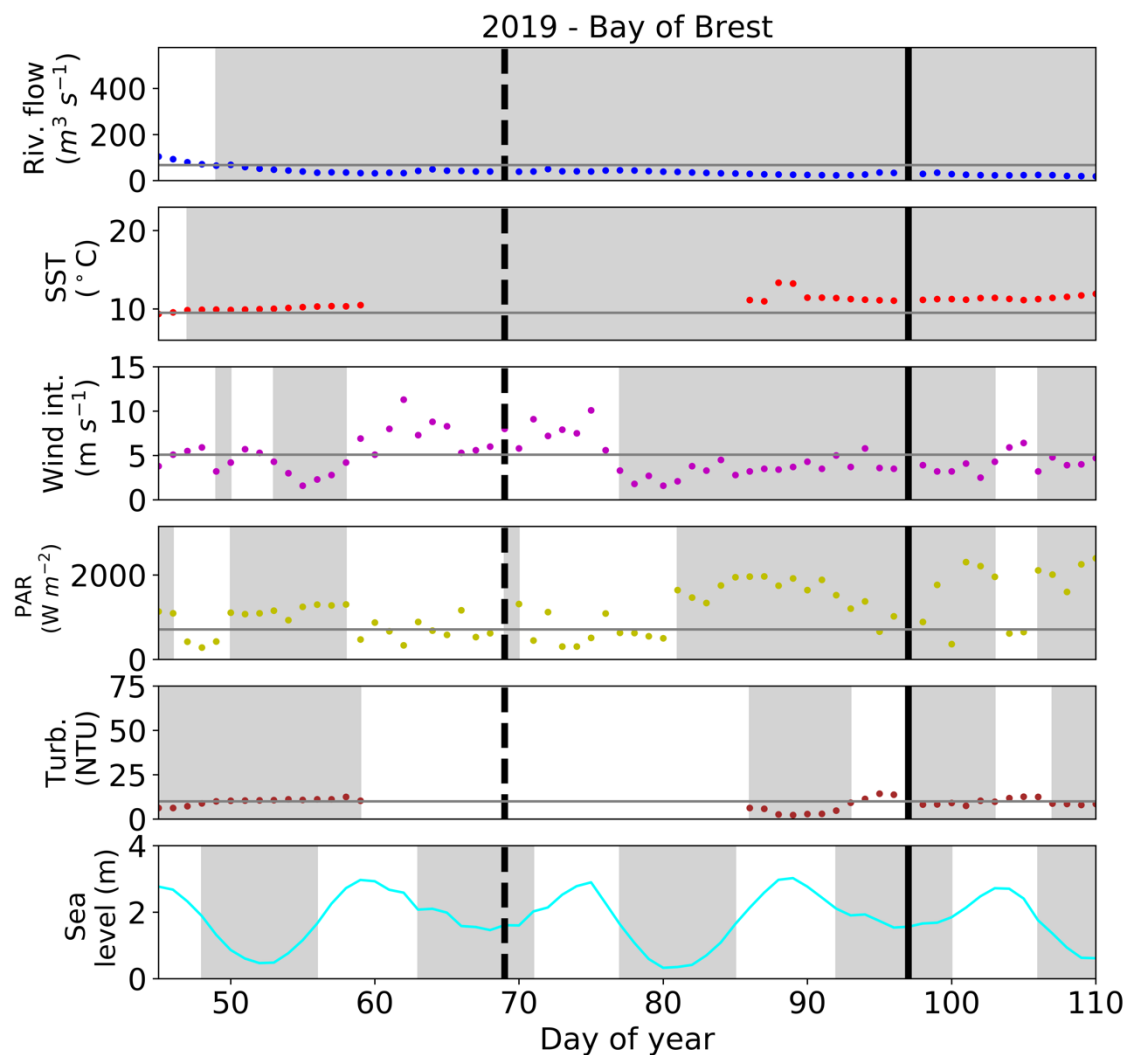

**Figure S1: Evolution of the Chl-*a* fluorescence and the environmental drivers: River flow of the Aulne, Sea Surface Temperature, wind intensity, PAR, turbidity and sea level for a mean IPGP in the Bay of Brest (a) 2001 (b) 2002 (c) 2003 (d) 2004 (e) 2007 (f) 2010 (g) 2012 (h) 2014 (i) 2015 (j) 2016 (k) 2017 (l) 2019. The mean IPGP is represented by a dotted black line and the IPGP of the year is represented by a straight black line. Thresholds of each environmental driver are represented by gray vertical lines corresponding to the mean conditions  $\pm 15$  days around the IPGP date. Gray areas are time periods favorable to IPGP.**

(a)

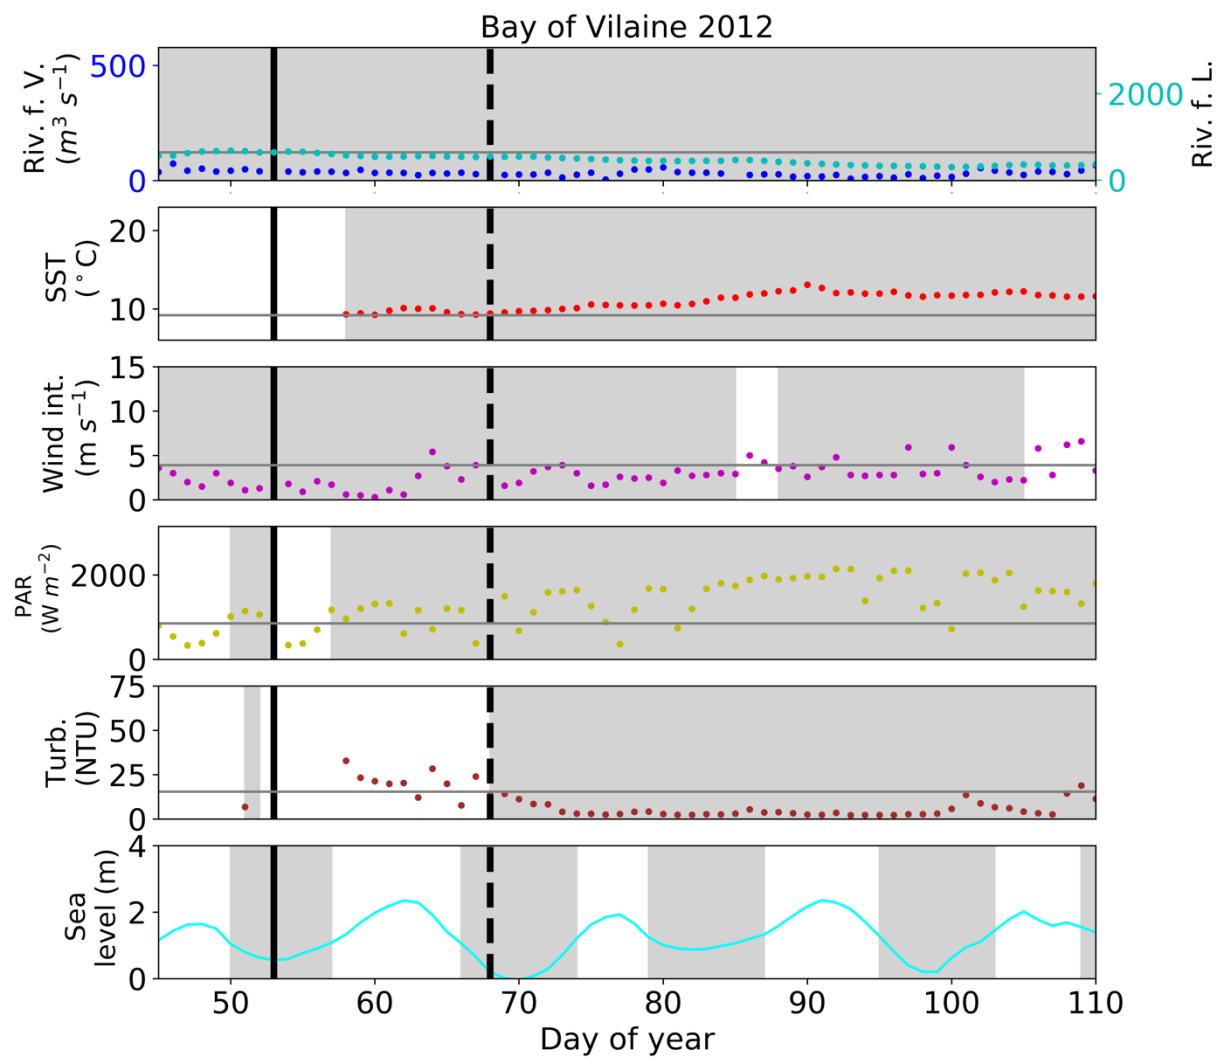

(b)

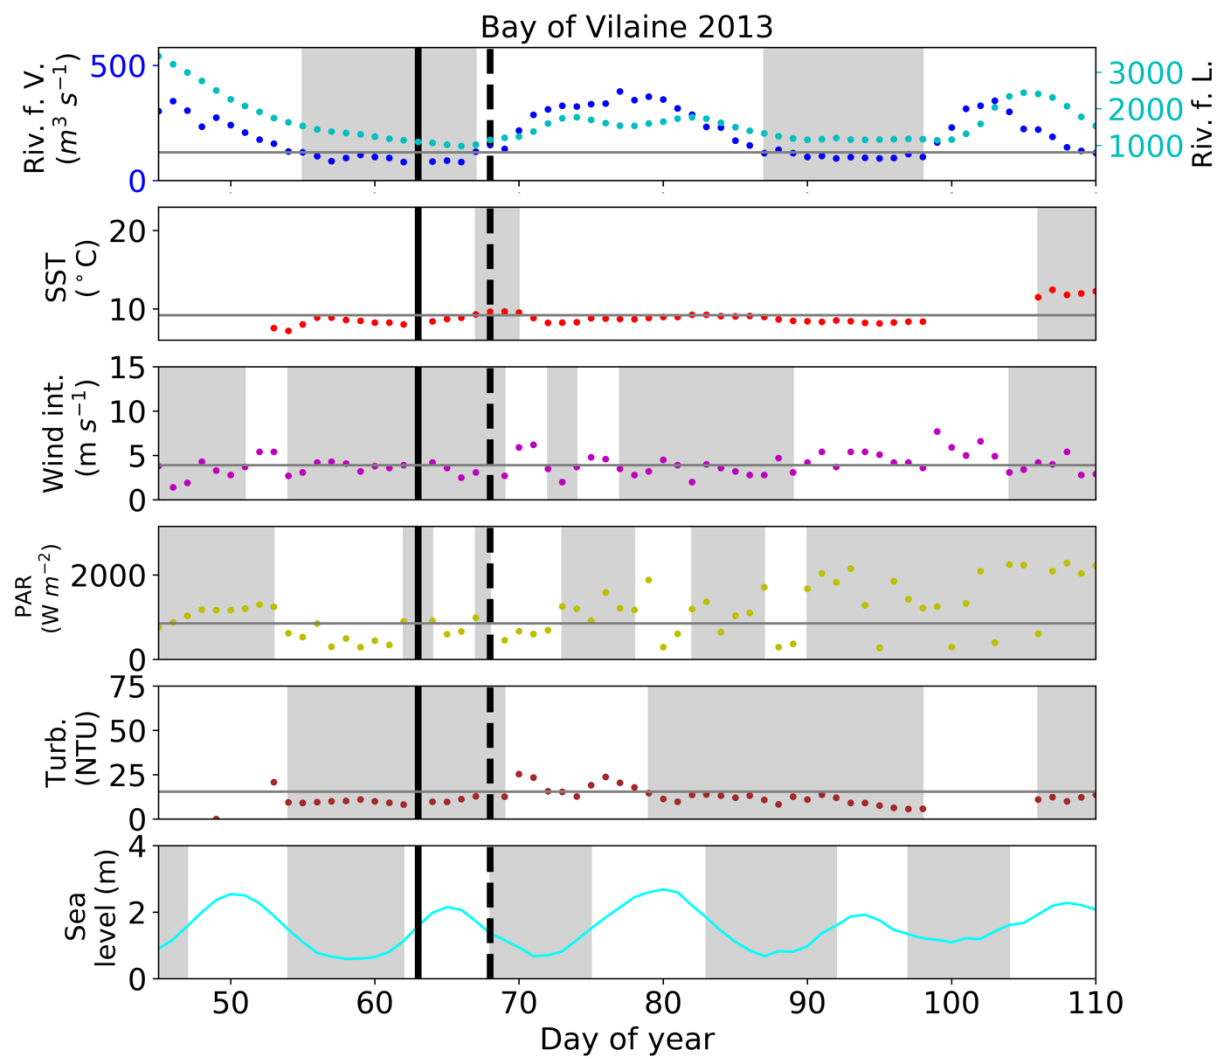

(c)



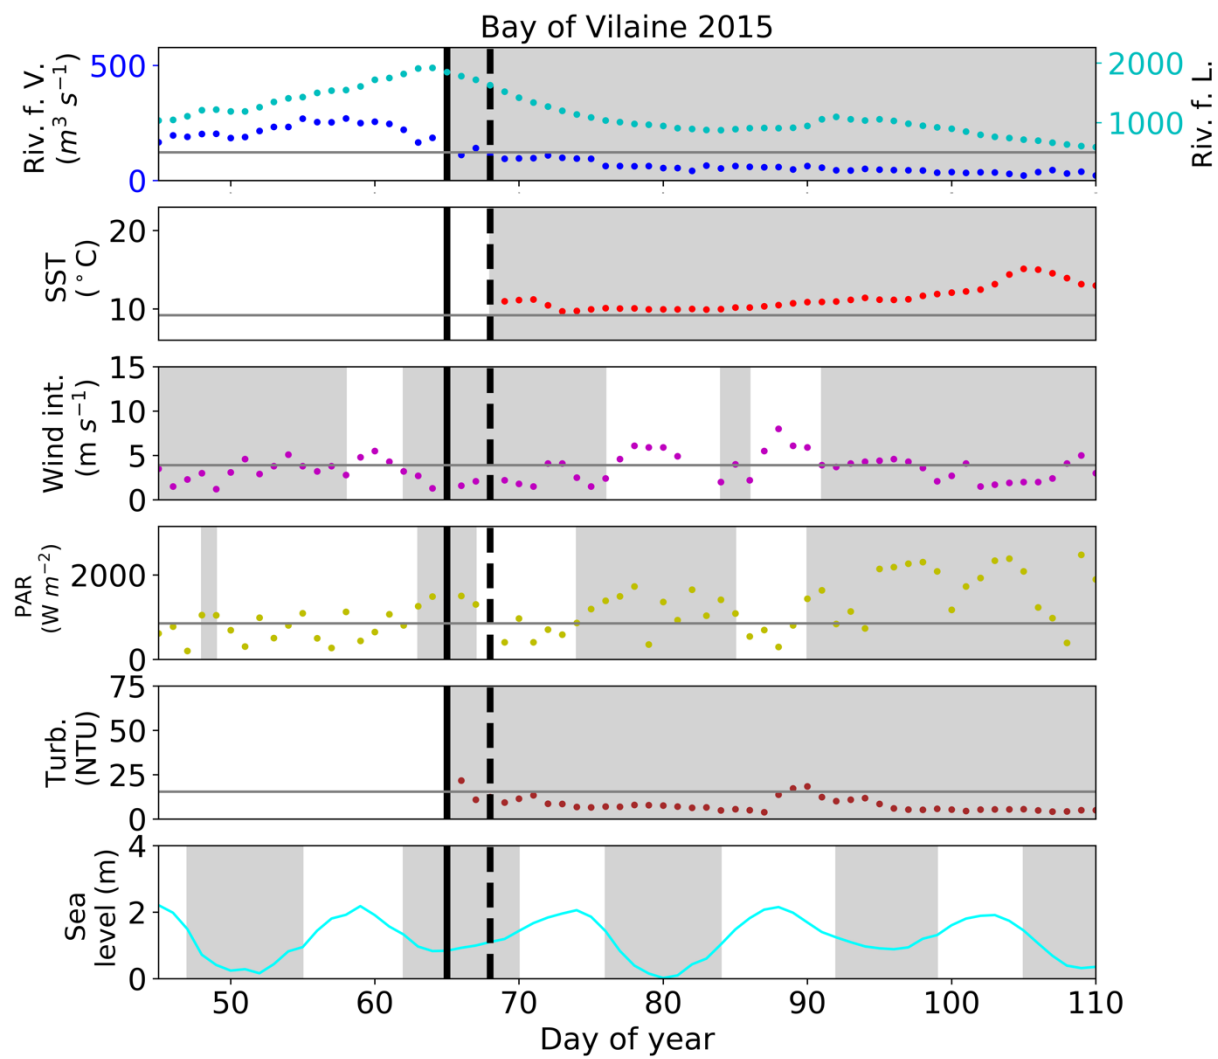

(d)

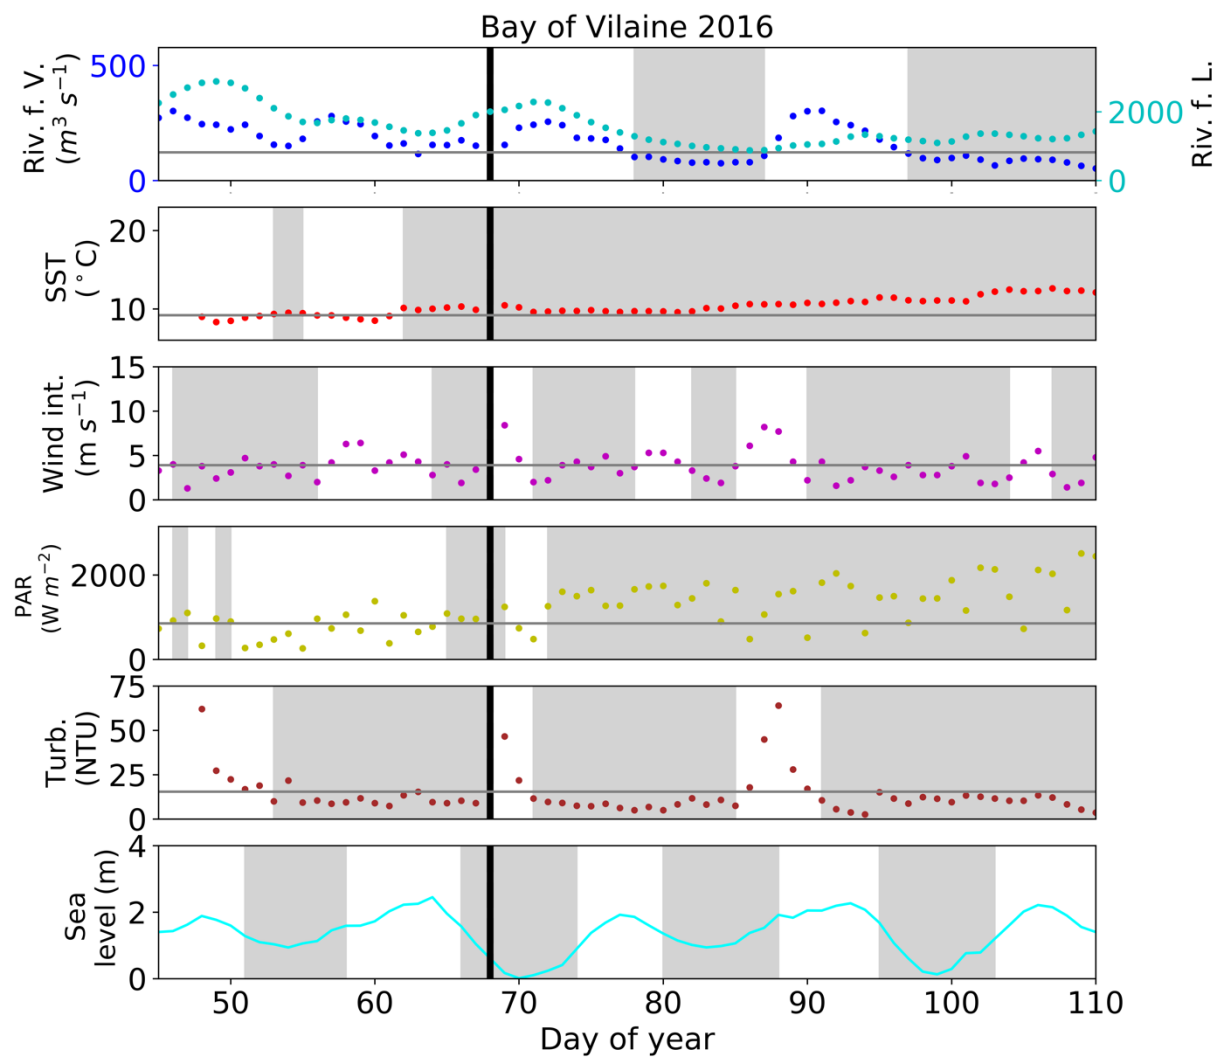

(e)

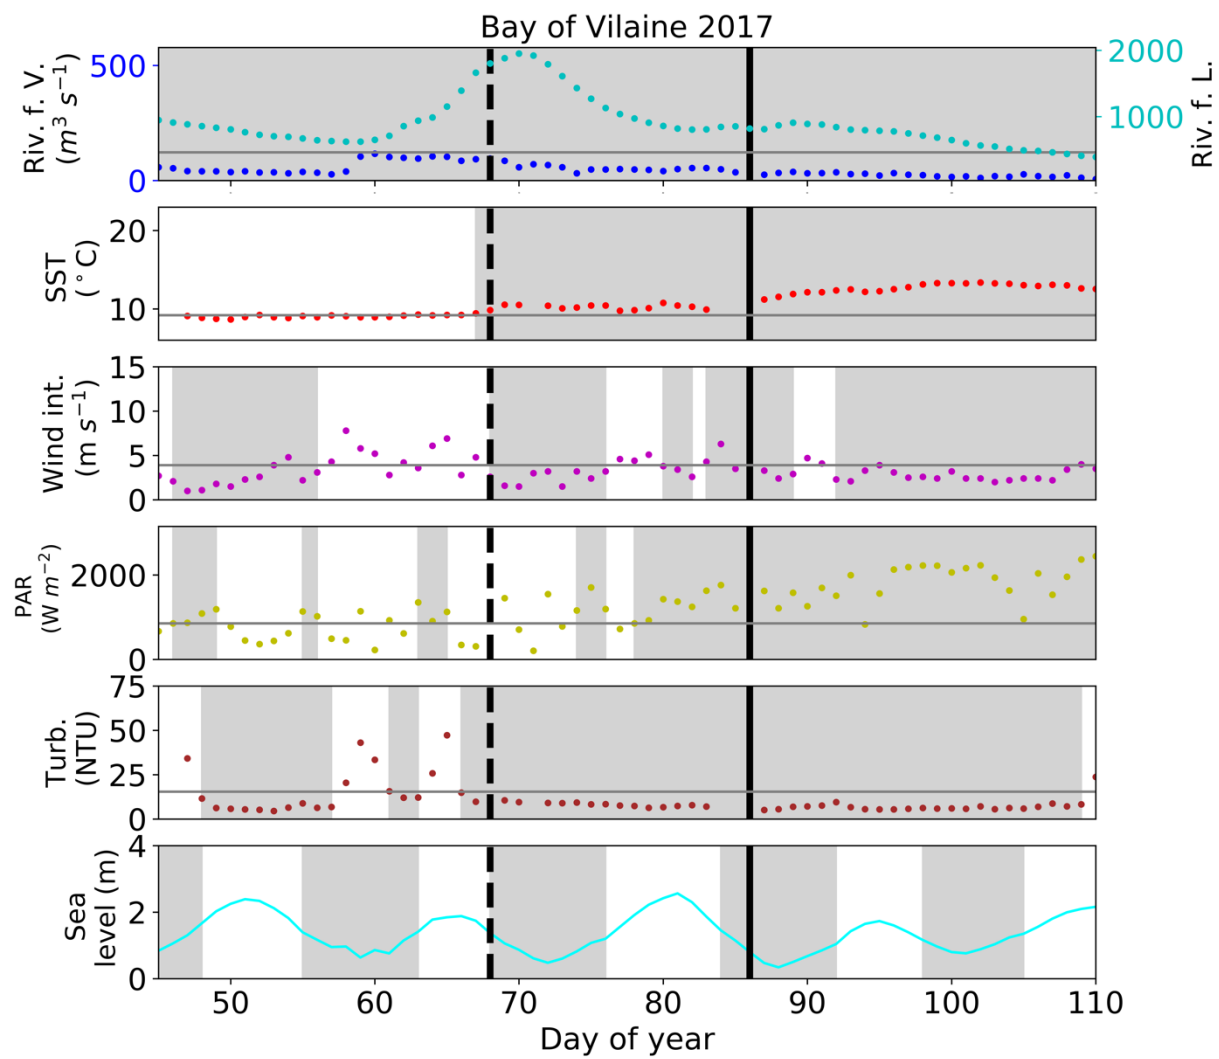

(f)

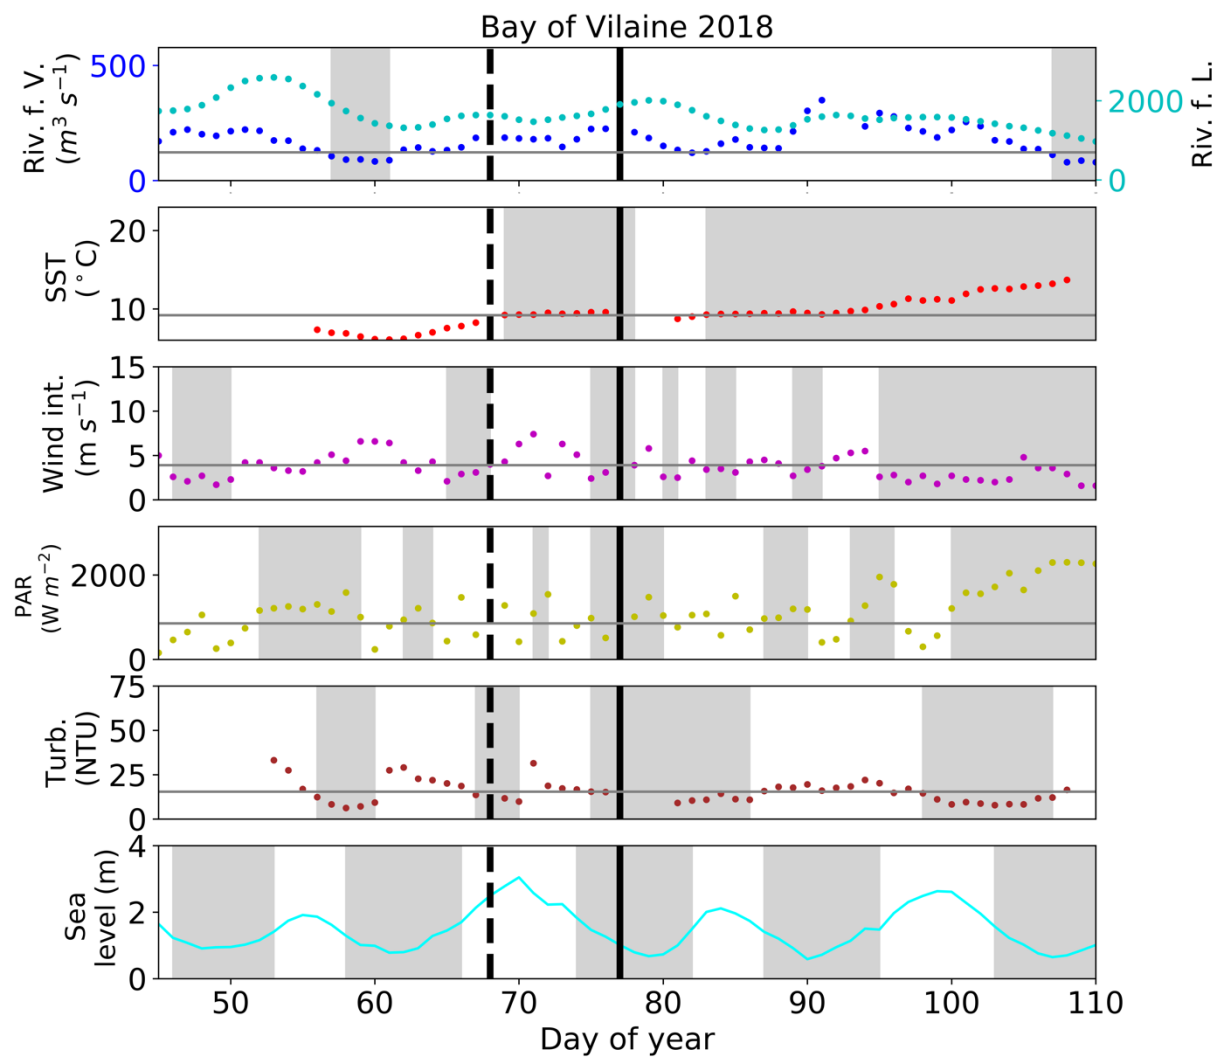

(g)

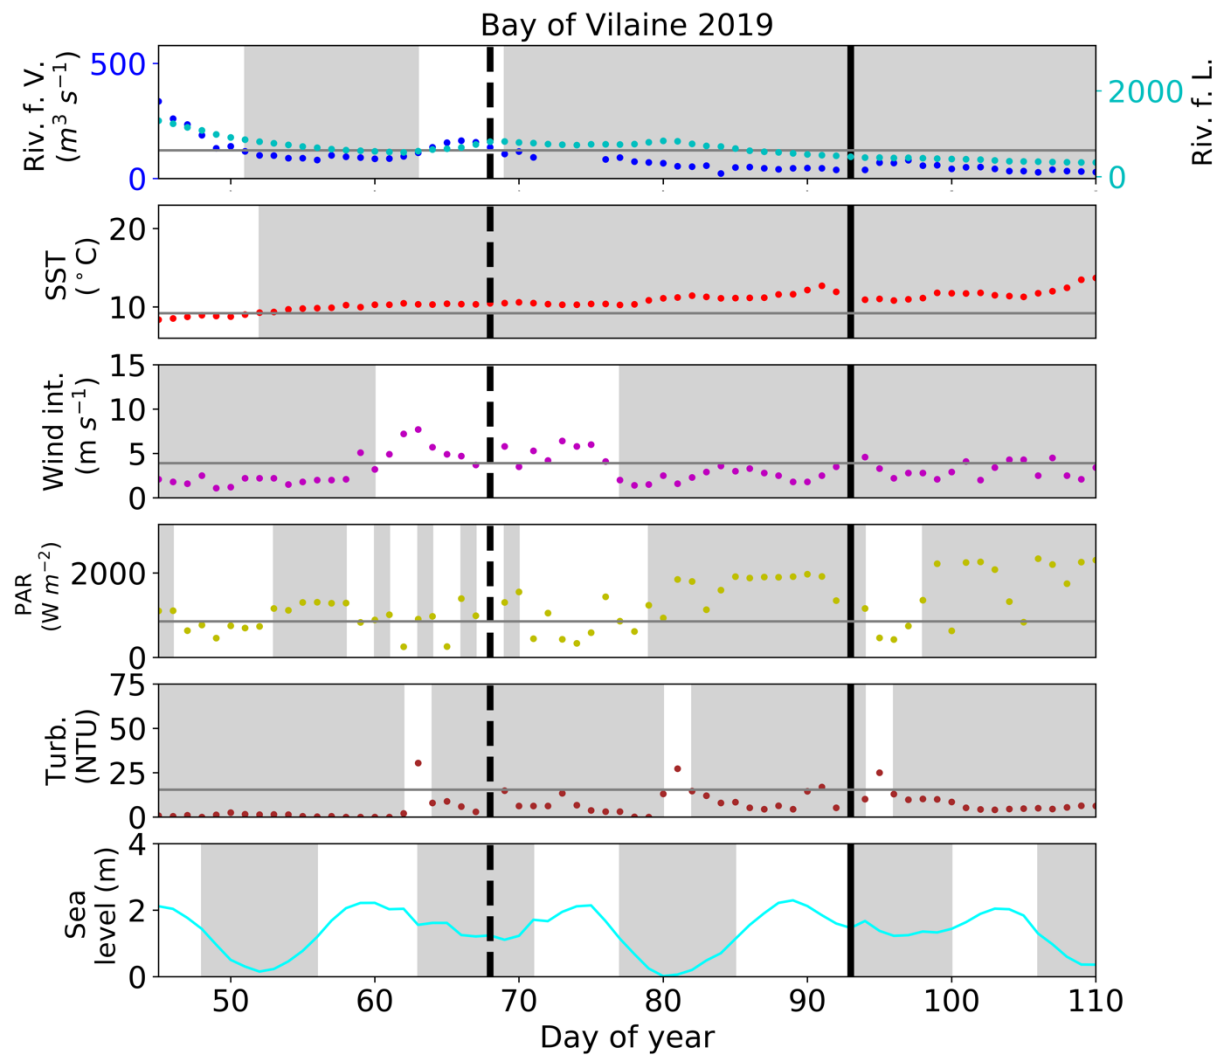

**Figure S2: Evolution of the Chl-*a* fluorescence and the environmental drivers: River flow of the Vilaine and Loire, Sea Surface Temperature, wind intensity, PAR, turbidity and sea level for a mean IPGP in the Bay of Vilaine (a) 2012 (b) 2013 (c) 2015 (d) 2016 (e) 2017 (f) 2018 (g) 2019. The mean IPGP is represented by a dotted black line and the IPGP of the year is represented by a straight black line. Thresholds of each environmental driver are represented by grey vertical lines corresponding to the mean conditions  $\pm 15$  days around the IPGP date. Grey areas are time periods favorable to IPGP.**
